# Supplementary material for: Transgenic Zebrafish Reveal Tissue-Specific Differences in Estrogen Signaling in Response to Environmental Water Samples
Source: PubMed Central journal article supplement (PMC3984228; doi:10.1289/ehp.1307329), 2014-01-14
Supplement: ehp.1307329.s001.pdf [file ehp.1307329.s001.pdf]

## **Supplemental Material**

# **Transgenic Zebrafish Reveal Tissue-Specific Differences in Estrogen Signaling in Response to Environmental Water Samples**

Daniel A. Gorelick, Luke R. Iwanowicz, Alice L. Hung, Vicki S. Blazer, and Marnie E. Halpern

### **Table of Contents**

|                                 |      |
|---------------------------------|------|
| Supplemental Material, Table S1 | p. 2 |
| Supplemental Material, Table S2 | p. 3 |
| Supplemental Material, Movie S1 | p. 5 |

**Supplemental Material, Table S1.** 2010 Susquehanna, Delaware, Allegheny and Shenandoah River Watershed

Passive Sampling Study.

| <b>Sample ID</b> | <b>Deployment date</b> | <b>Retrieval date</b> | <b>Total days</b> | <b>Location #</b> | <b>Location</b>                                                         | <b>N</b> | <b>W</b> |
|------------------|------------------------|-----------------------|-------------------|-------------------|-------------------------------------------------------------------------|----------|----------|
| 1                | 4/21/10                | 6/1/10                | 41                | SUS 5             | Juniata River, Newport, Pennsylvania<br>Susquehanna River at Mahantango | 40.4910  | -77.0995 |
| 2                | 4/21/10                | 6/1/10                | 41                | SUS 6             | Creek, Browns Island, Pennsylvania                                      | 40.6515  | -76.9228 |
| 3                | 4/19/10                | 6/3/10                | 45                | DE-1              | Delaware River, Yardley, Pennsylvania                                   | 40.2514  | -74.8414 |
| 4                | 4/28/10                | 6/7/10                | 40                | AL-1              | Allegheny River, Kittanning, Pennsylvania                               | 40.8138  | -79.5252 |
| 5                | 5/12/10                | 6/14/10               | 33                | PSS 16            | Cooks Creek, Virginia                                                   | 38.3734  | -78.9374 |
| 6                | 5/12/10                | 6/15/10               | 34                | PSS 09            | Naked Creek, Virginia                                                   | 38.3088  | -78.9226 |
| 7                | 5/13/10                | 6/15/10               | 33                | PSS 15            | Muddy Creek, Virginia                                                   | 38.4308  | -78.9806 |
| 8                | 5/13/10                | 6/15/10               | 33                | PSS 10            | Briery Branch, Virginia                                                 | 38.3995  | -79.0232 |
| 9                | 5/13/10                | 6/14/10               | 32                | PSS 12            | Long Glade Creek, Virginia                                              | 38.3773  | -78.9806 |
| 10               | 5/13/10                | 6/14/10               | 32                | PSS 11            | Smith Creek (upstream), Virginia                                        | 38.5382  | -78.7505 |
| 11               | 5/13/10                | 6/14/10               | 32                | PSS 13            | Linville Creek, Virginia                                                | 38.6141  | -78.8004 |
| 12               | 5/13/10                | 6/14/10               | 32                | PSS 14            | Long Meadow Run, Virginia                                               | 38.6339  | -78.7484 |
| 13               | 5/13/10                | 6/14/10               | 32                | PSS 08            | Smith Creek (downstream), Virginia                                      | 38.7116  | -78.6416 |
| 14               | 5/13/10                | 6/14/10               | 32                | PSS 06            | Mill Creek, Virginia                                                    | 38.7433  | -78.6450 |
| 15               | 5/14/10                | 6/14/10               | 31                | PSS 02            | Gooney Run, Virginia                                                    | 38.8669  | -78.2477 |
| 16               | 5/14/10                | 6/14/10               | 31                | PSS 07            | Hawksbill Creek, Virginia                                               | 38.7083  | -78.4564 |
| 17               | 5/14/10                | 6/15/10               | 32                | PSS 03            | Passage Creek, Virginia                                                 | 38.8238  | -78.4281 |
| 18               | 5/14/10                | 6/15/10               | 32                | PSS 05            | Stony Creek (downstream), Virginia                                      | 38.8210  | -78.5550 |
| 19               | 5/14/10                | 6/15/10               | 32                | PSS 04            | Stony Creek (upstream), Virginia                                        | 38.8912  | -78.6843 |

**Supplemental Material, Table S2.** Reporter activity in 3-4 day old 5xERE:GFP zebrafish in response to 2010 Susquehanna, Delaware, Allegheny and Shenandoah passive samples.

| Sample ID       | Location | E2Eq <sup>a</sup> | Dilution                        | Reporter activity       | Total embryos (N) <sup>b</sup> |
|-----------------|----------|-------------------|---------------------------------|-------------------------|--------------------------------|
| 1               | SUS 5    | 2.94              | 1:100                           | lethal                  | 4                              |
| 1               | SUS 5    | 2.94              | 1:500                           | GFP heart valves, liver | 5                              |
| 1               | SUS 5    | 2.94              | 1:1000                          | GFP-negative            | 15                             |
| 2               | SUS 6    | 3.13              | 1:100                           | lethal                  | 4                              |
| 2               | SUS 6    | 3.13              | 1:500                           | GFP heart valves, liver | 5                              |
| 2               | SUS 6    | 3.13              | 1:1000                          | GFP-negative            | 15                             |
| 3 <sup>c</sup>  | DE-1     | 1.58              | 1:100                           | lethal                  | 4                              |
| 3 <sup>c</sup>  | DE-1     | 1.58              | 1:1000                          | GFP heart valves        | 4                              |
| 3 <sup>c</sup>  | DE-1     | 1.58              | 1:1000                          | GFP heart valves, liver | 10                             |
| 3 <sup>c</sup>  | DE-1     | 1.58              | 1:1000 + 10 $\mu$ M ICI 182,780 | GFP-negative            | 5                              |
| 4 <sup>d</sup>  | AL-1     | 0.78              | 1:100                           | lethal                  | 4                              |
| 4 <sup>d</sup>  | AL-1     | 0.78              | 1:500                           | GFP-negative            | 5                              |
| 4 <sup>d</sup>  | AL-1     | 0.78              | 1:1000                          | GFP-negative            | 15                             |
| 5               | PSS 16   | 3.79              | 1:100                           | lethal                  | 4                              |
| 5               | PSS 16   | 3.79              | 1:1000                          | GFP heart valves, liver | 15                             |
| 5               | PSS 16   | 3.79              | 1:2000                          | GFP-negative            | 5                              |
| 6 <sup>c</sup>  | PSS 09   | 2.55              | 1:100                           | lethal                  | 4                              |
| 6 <sup>c</sup>  | PSS 09   | 2.55              | 1:500                           | GFP heart valves        | 30                             |
| 6 <sup>c</sup>  | PSS 09   | 2.55              | 1:1000                          | GFP-negative            | 15                             |
| 7 <sup>c</sup>  | PSS 15   | 2.86              | 1:100                           | lethal                  | 4                              |
| 7 <sup>c</sup>  | PSS 15   | 2.86              | 1:500                           | GFP heart valves, liver | 5                              |
| 7 <sup>c</sup>  | PSS 15   | 2.86              | 1:1000                          | GFP heart valves        | 15                             |
| 7 <sup>c</sup>  | PSS 15   | 2.86              | 1:1000                          | GFP-negative            | 25                             |
| 7 <sup>c</sup>  | PSS 15   | 2.86              | 1:1000 + 10 $\mu$ M ICI 182,780 | GFP-negative            | 5                              |
| 8               | PSS 10   | 1.18              | 1:100                           | GFP heart valves, liver | 9                              |
| 8               | PSS 10   | 1.18              | 1:500                           | GFP-negative            | 5                              |
| 8               | PSS 10   | 1.18              | 1:1000                          | GFP-negative            | 15                             |
| 9               | PSS 12   | 5.26              | 1:100                           | lethal                  | 4                              |
| 9               | PSS 12   | 5.26              | 1:500                           | GFP heart valves, liver | 5                              |
| 9               | PSS 12   | 5.26              | 1:1000                          | GFP heart valves, liver | 10                             |
| 9               | PSS 12   | 5.26              | 1:1000                          | GFP-negative            | 10                             |
| 10              | PSS 11   | 2.36              | 1:500                           | GFP heart valves        | 1                              |
| 10              | PSS 11   | 2.36              | 1:500                           | GFP heart valves, liver | 3                              |
| 10              | PSS 11   | 2.36              | 1:1000                          | GFP-negative            | 15                             |
| 11 <sup>c</sup> | PSS 13   | 2.85              | 1:1000                          | GFP heart valves, liver | 10                             |
| 11 <sup>c</sup> | PSS 13   | 2.85              | 1:2000                          | GFP heart valves        | 6                              |
| 11 <sup>c</sup> | PSS 13   | 2.85              | 1:2000                          | GFP-negative            | 23                             |
| 11 <sup>c</sup> | PSS 13   | 2.85              | 1:4000                          | GFP-negative            | 5                              |
| 12 <sup>c</sup> | PSS 14   | 5.41              | 1:1000                          | GFP heart valves, liver | 10                             |
| 12 <sup>c</sup> | PSS 14   | 5.41              | 1:2000                          | GFP heart valves        | 13                             |
| 12 <sup>c</sup> | PSS 14   | 5.41              | 1:2000                          | GFP heart valves, liver | 1                              |
| 12 <sup>c</sup> | PSS 14   | 5.41              | 1:2000                          | GFP-negative            | 15                             |
| 12 <sup>c</sup> | PSS 14   | 5.41              | 1:4000                          | GFP-negative            | 5                              |
| 13 <sup>d</sup> | PSS 08   | 0.76              | 1:500                           | GFP-negative            | 5                              |
| 13 <sup>d</sup> | PSS 08   | 0.76              | 1:1000                          | GFP-negative            | 15                             |

| Sample ID       | Location | E2Eq <sup>a</sup> | Dilution                        | Reporter activity       | Total embryos (N) <sup>b</sup> |
|-----------------|----------|-------------------|---------------------------------|-------------------------|--------------------------------|
| 14              | PSS 06   | 4.19              | 1:500                           | GFP liver               | 1                              |
| 14              | PSS 06   | 4.19              | 1:500                           | GFP heart valves, liver | 3                              |
| 14              | PSS 06   | 4.19              | 1:1000                          | GFP-negative            | 15                             |
| 15              | PSS 02   | 1.28              | 1:500                           | GFP heart valves, liver | 5                              |
| 15              | PSS 02   | 1.28              | 1:1000                          | GFP-negative            | 15                             |
| 16              | PSS 07   | 7.98              | 1:1000                          | GFP heart valves, liver | 15                             |
| 16              | PSS 07   | 7.98              | 1:2000                          | GFP heart valves, liver | 5                              |
| 16              | PSS 07   | 7.98              | 1:4000                          | GFP-negative            | 5                              |
| 16              | PSS 07   | 7.98              | 1:1000 + 10 $\mu$ M ICI 182,780 | GFP-negative            | 5                              |
| 17 <sup>d</sup> | PSS 03   | 0.54              | 1:500                           | GFP-negative            | 5                              |
| 17 <sup>d</sup> | PSS 03   | 0.54              | 1:1000                          | GFP-negative            | 10                             |
| 18              | PSS 05   | 3.06              | 1:1000                          | GFP heart valves, liver | 15                             |
| 18              | PSS 05   | 3.06              | 1:2000                          | GFP-negative            | 5                              |
| 18              | PSS 05   | 3.06              | 1:1000 + 10 $\mu$ M ICI 182,780 | GFP-negative            | 5                              |
| 19              | PSS 04   | 0.82              | 1:500                           | GFP liver               | 1                              |
| 19              | PSS 04   | 0.82              | 1:500                           | GFP heart valves, liver | 3                              |
| 19              | PSS 04   | 0.82              | 1:500                           | GFP-negative            | 25                             |
| 19              | PSS 04   | 0.82              | 1:1000                          | GFP-negative            | 15                             |

<sup>a</sup>Estradiol equivalents (ng/POCIS) from bioluminescent yeast estrogen receptor reporter assay (see “Methods” for details).

<sup>b</sup>Indicates total number of embryos with indicated phenotype. <sup>c</sup>Indicates samples that preferentially activated the zebrafish reporter in heart valves. <sup>d</sup>Indicates samples that failed to activate the zebrafish reporter.

**Supplemental Material, Movie S1.** (NOTE: This movie is available as a separate Supplemental Material file that may be downloaded from the *EHP* website.) Estrogen receptors in heart valves respond to environmental estrogens. *Tg(5xERE:GFP)<sup>c262/c262</sup>* larvae were exposed to POCIS sample 16 (Hawksbill Creek) diluted 1:500 at 2 days post fertilization. The following day, time-lapse images of GFP fluorescence in live larvae were captured for 30 seconds totaling 56 frames, 10 millisecond exposure per frame using a 20X / 0.75 NA objective. The movie plays at 5 frames per second. Note the fluorescence in the aortic and atrioventricular valves. Lateral view; anterior to the left, dorsal to the top.
